# Supplementary material
Source: publisher figshare collection journal article supplement (https://gsapubs.figshare.com/articles/dataset/_/12529145)
Supplement: Supplementary file 1 [file 1]

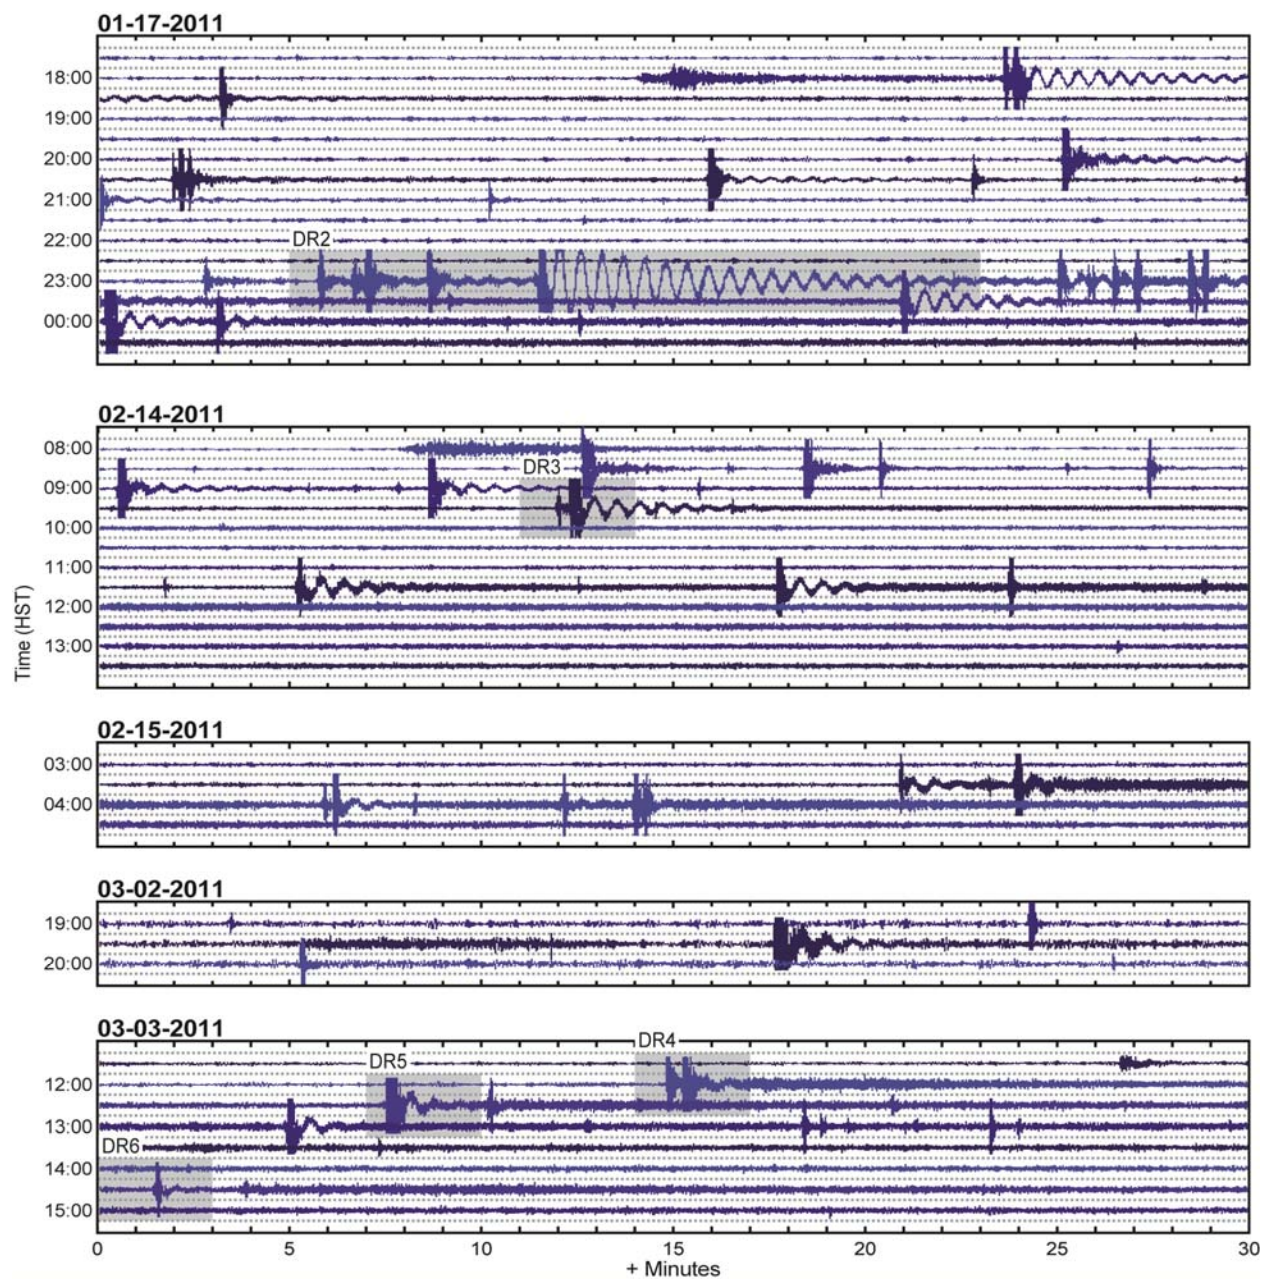

**Figure DR1.** Seismic traces for periods encompassing rockfall sequences during January–March 2011. Gray boxes correspond to Movies DR1–DR5 in sequential order.

#### Movie-DR1.mov

**Movie DR1.** Movie comparing rockfalls into active lava lake to NPT seismicity at Kīlauea volcano for period 23:05–23:20 on January 17, 2011. Webcam video recorded at ~4 fps; playback speed 24 fps. Timestamp not adjusted for ~4 s acquisition delay.

#### Movie-DR2.mov

**Movie DR2.** Movie comparing rockfalls into active lava lake to NPT seismicity at Kīlauea volcano for period 9:41–9:44 on February 14, 2011. Webcam video recorded at ~4 fps; playback speed 24 fps. Timestamp not adjusted for ~4 s acquisition delay.

#### Movie-DR3.mov

**Movie DR3.** Movie comparing rockfalls into active lava lake to NPT seismicity at Kīlauea volcano for period 12:14–12:17 on March 3, 2011. Webcam video recorded at ~4 fps; playback speed 24 fps. Timestamp not adjusted for ~4 s acquisition delay.

#### Movie-DR4.mov

**Movie DR4.** Movie comparing rockfall into active lava lake to NPT seismicity at Kīlauea volcano for period 12:37–12:40 on March 3, 2011. Webcam video recorded at ~4 fps; playback speed 24 fps. Timestamp not adjusted for ~4 s acquisition delay.

#### Movie-DR5.mov

**Movie DR5.** Movie comparing rockfalls into active lava lake to NPT seismicity at Kīlauea volcano for period 14:30–14:33 on March 3, 2011. Webcam video recorded at ~4 fps; playback speed 24 fps. Note steaming crack at upper left side of image frame, below timestamp, marking line of subsequent failure. Timestamp not adjusted for ~4 s acquisition delay.
